# Supplementary material for: Epigenetic activation of the FLT3 gene by ZNF384 fusion confers a therapeutic susceptibility in acute lymphoblastic leukemia
Source: PubMed Central journal article supplement (PMC9474531; doi:10.1038/s41467-022-33143-w), 2022-09-14
Supplement: 41467_2022_33143_MOESM1_ESM.pdf [file 41467_2022_33143_MOESM1_ESM.pdf]

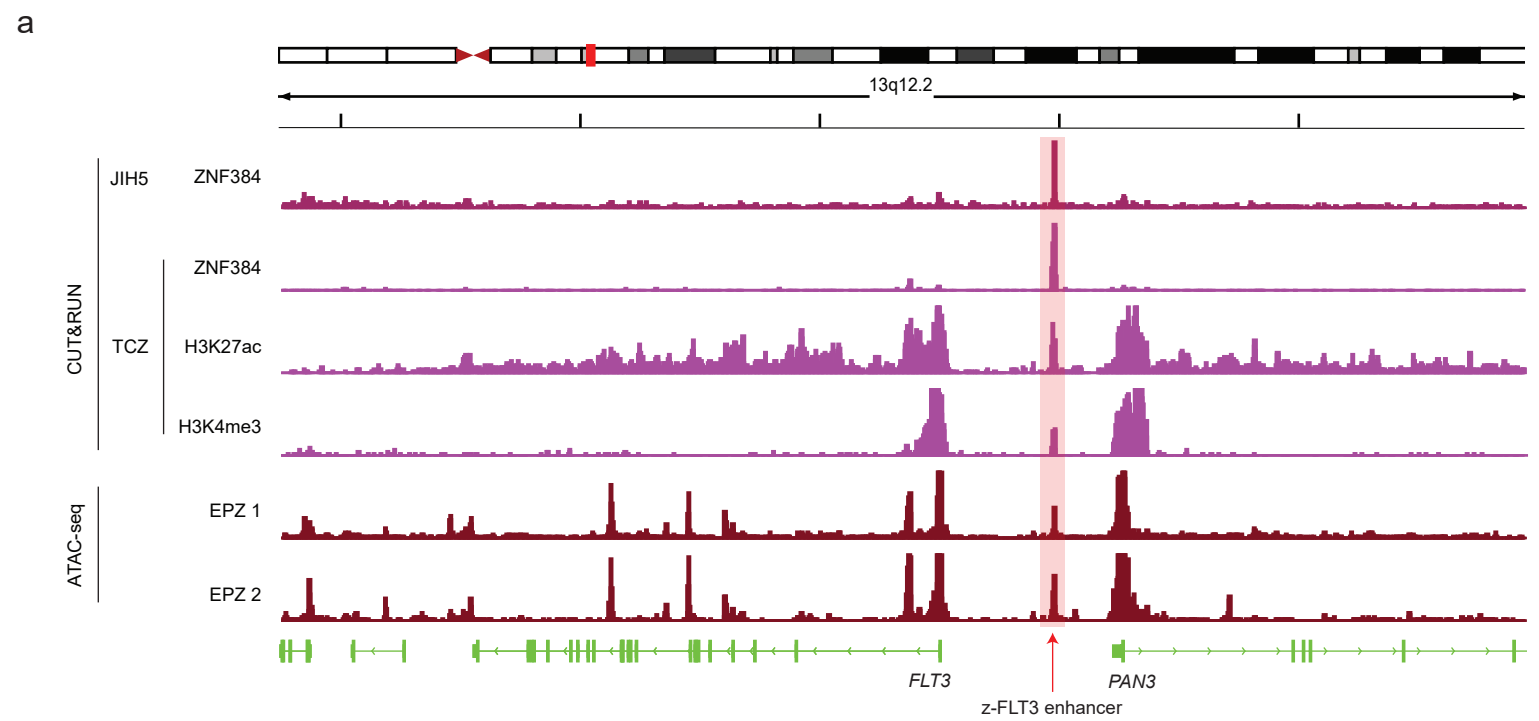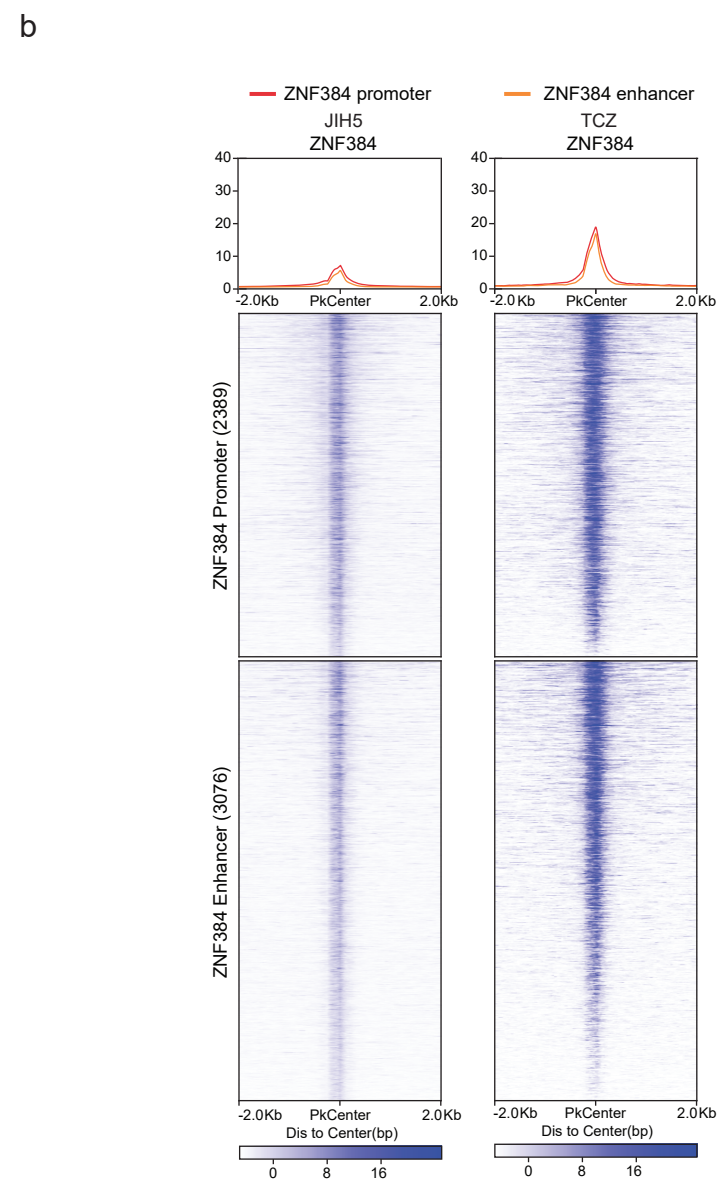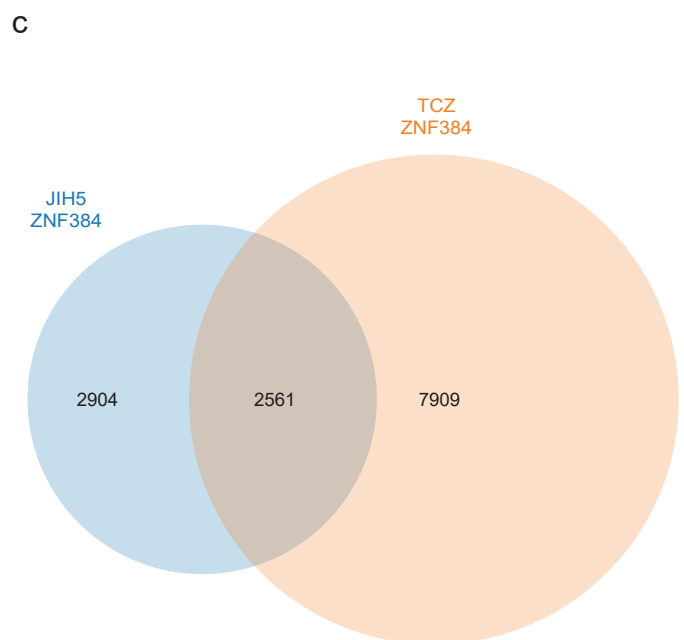

**Supplementary Fig. 1: ZNF384 CUT&RUN in JIH5 cells.** **a** ZNF384 binding profiling was characterized by ZNF384 CUT&RUN in JIH5 cells (top panel). A specific binding peak was observed at the upstream of *FLT3* gene, overlapping with the z-FLT3 enhancer identified in *TCF3-ZNF384* ALL PDX sample (TCZ). **b** In ZNF384 CUT&RUN assay using JIH5 cells, a total of 5,465 peaks were identified, with 2,389 in promoter regions ( $\pm$  2kb from TSS) and the other 3,076 in enhancers. **c** Of the ZNF384 binding peaks in JIH5 cells, 2,561 peaks were overlapped with that in TCZ sample. Source data are provided as a Source Data file.

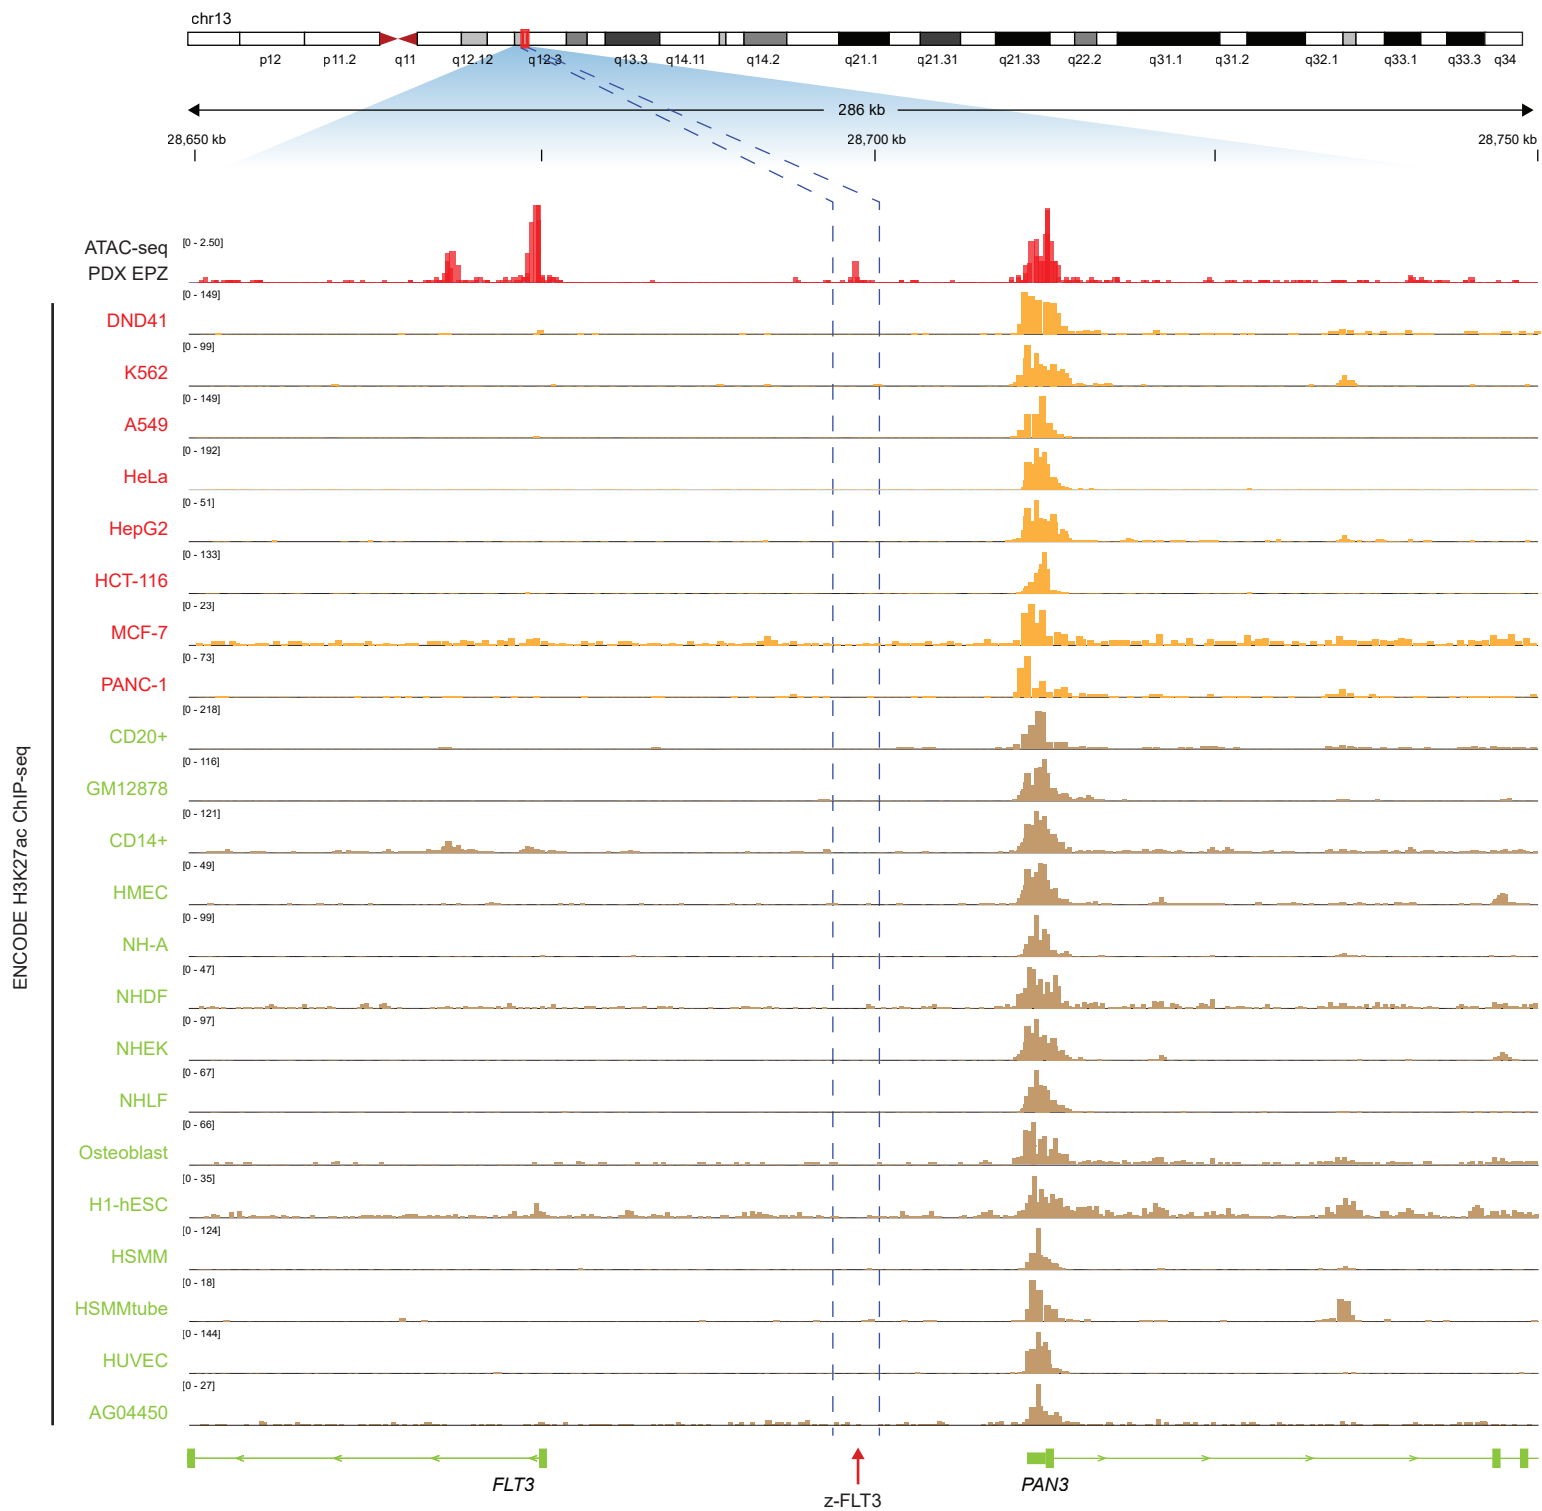

**Supplementary Fig. 2: z-FLT3 enhancer is unique to ZNF384-r ALL.** Exploring all the available H3K27ac ChIP-seq data of a series of 8 cancer cell lines and 14 normal human cells/tissues included in ENCODE, we did not observe the z-FLT3 enhancer (top track, ATAC-seq data from PDX EPZ) in any of them. Source data are provided as a Source Data file.

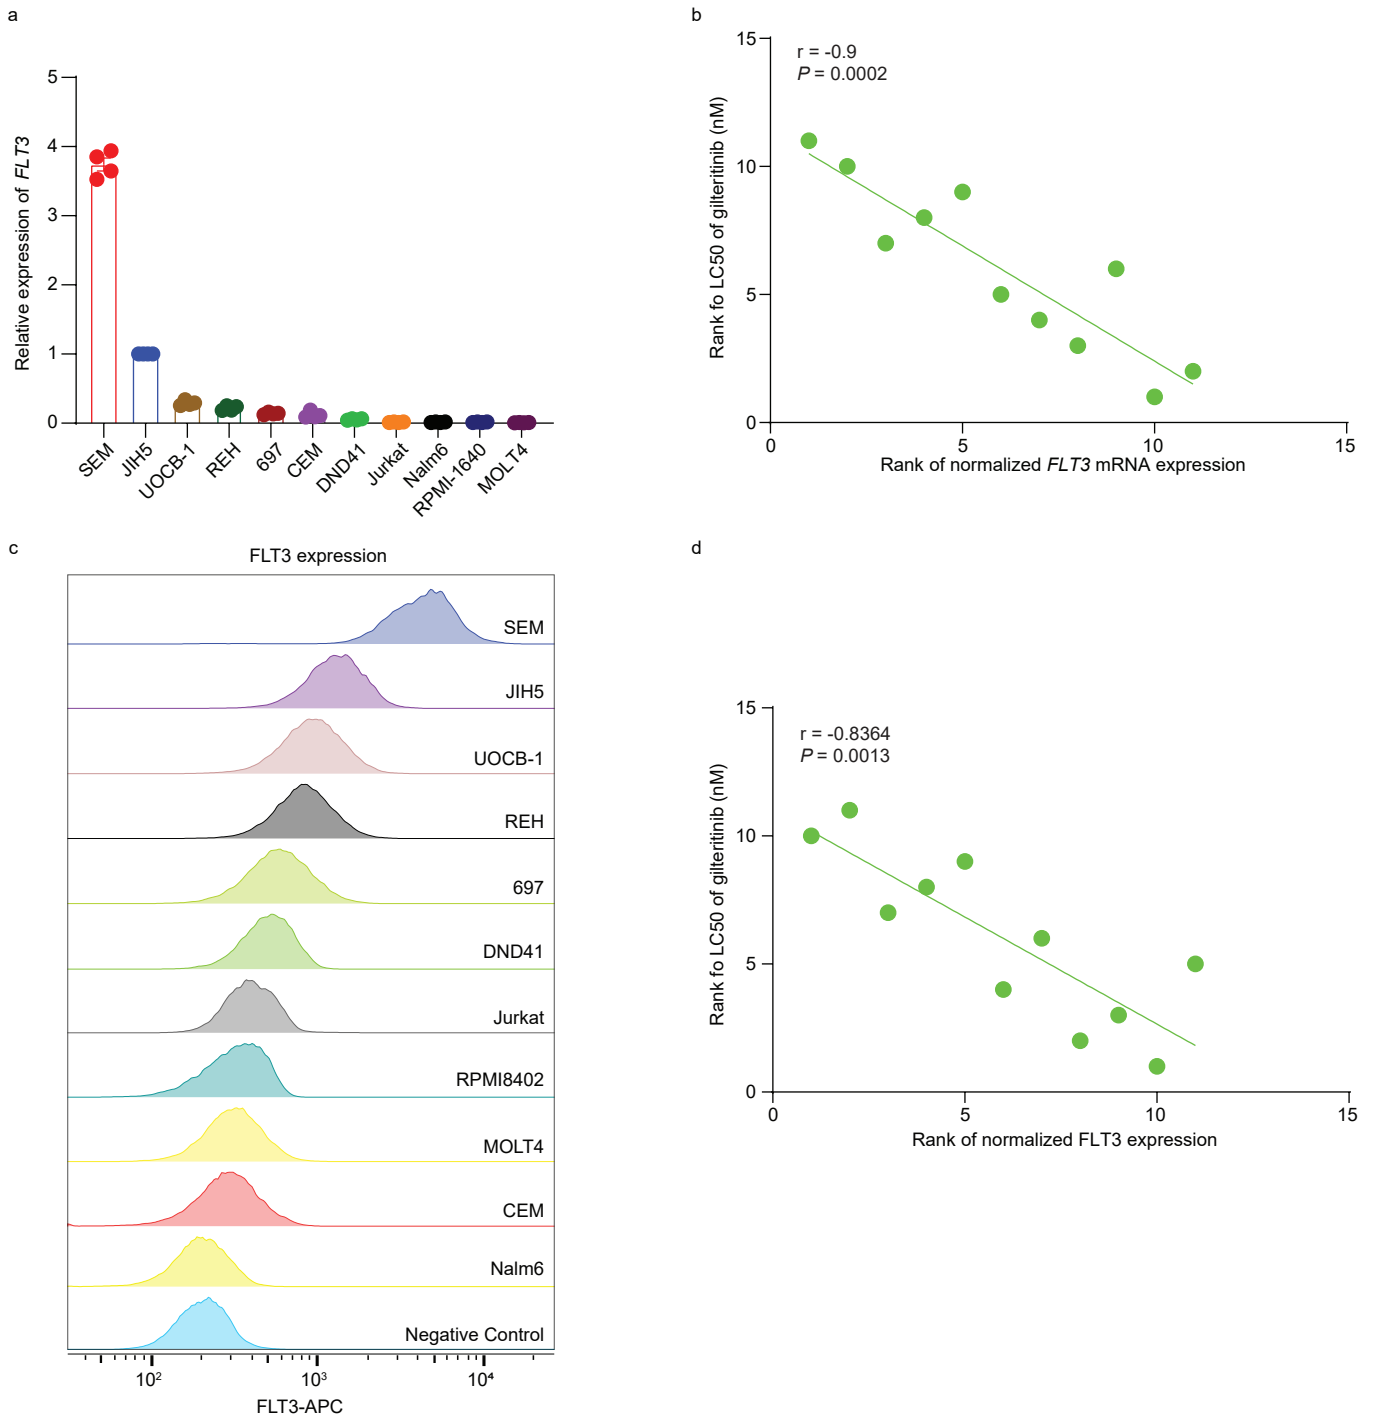

**Supplementary Fig. 3: Cytotoxic effect of gilteritinib is correlated with FLT3 expression in ALL cell lines.** **a** *FLT3* expression of 11 ALL cells was determined by RT-PCR. Data points represent relative expression of *FLT3* normalized to that of JH5 cells. Data are shown as mean values  $\pm$  SEM of four biological replicates (center of the error bar) and results are representative of three independent experiments. **b** A negative correlation between LC50 of gilteritinib and *FLT3* expression was evaluated using two-sided Pearson correlation test ( $r = -0.9$ ,  $P = 0.0002$ ). **c** *FLT3* expression on the surface of 11 ALL cells was determined by flow cytometry. **d** A negative correlation between LC50 of gilteritinib and *FLT3* expression was assessed using two-sided Pearson correlation test ( $r = -0.8364$ ,  $P = 0.0013$ ). Source data are provided as a Source Data file.

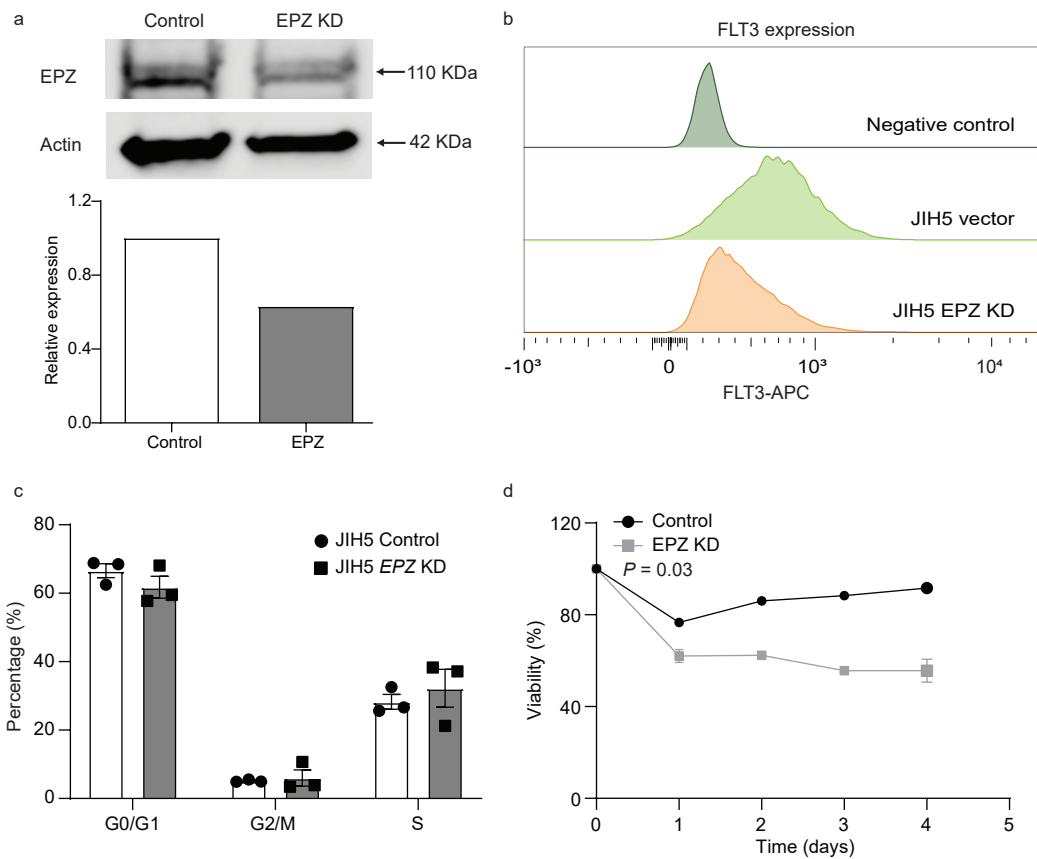

**Supplementary Fig. 4: Knocking down EPZ fusion gene led to decreased FLT3 expression and cell viability in JIH5 cells.** **a** Down regulation of EPZ fusion protein by Cas9/CRISPR was confirmed by Western blot, and quantified results were shown in the bar graph after normalizing to actin. Three independent experiments (biological replicates) were performed showing similar results. **b** Knocking down EPZ fusion protein led to down-regulated FLT3 expression on the surface of JIH5 cells, evaluated by flow cytometry. **c-d** Knocking down EPZ fusion protein didn't change the cell cycle distribution (**c**) but led to decreased cell viability of JIH5 cells (**d**). Data are shown as mean values  $\pm$  SEM of three biological replicates (center of the error bar) and results are representative of three independent experiments.  $P$  value ( $P = 0.03$ ) was estimated using two-sided  $t$ -test. Source data are provided as a Source Data file.

a

JIH5

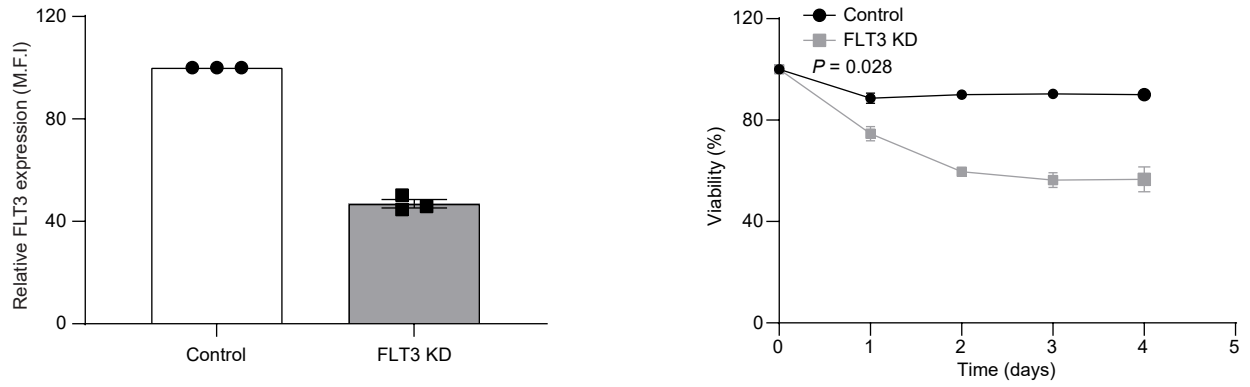

b

697

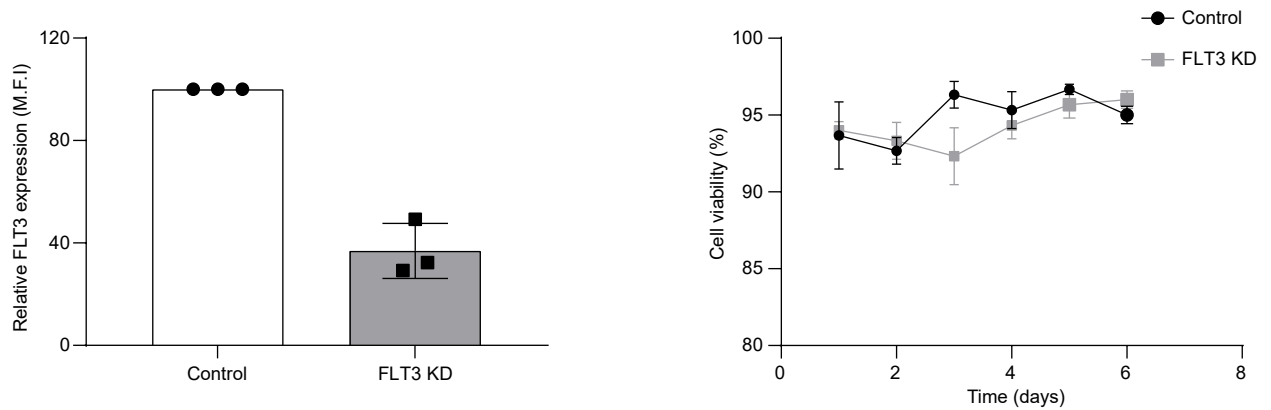

c

REH

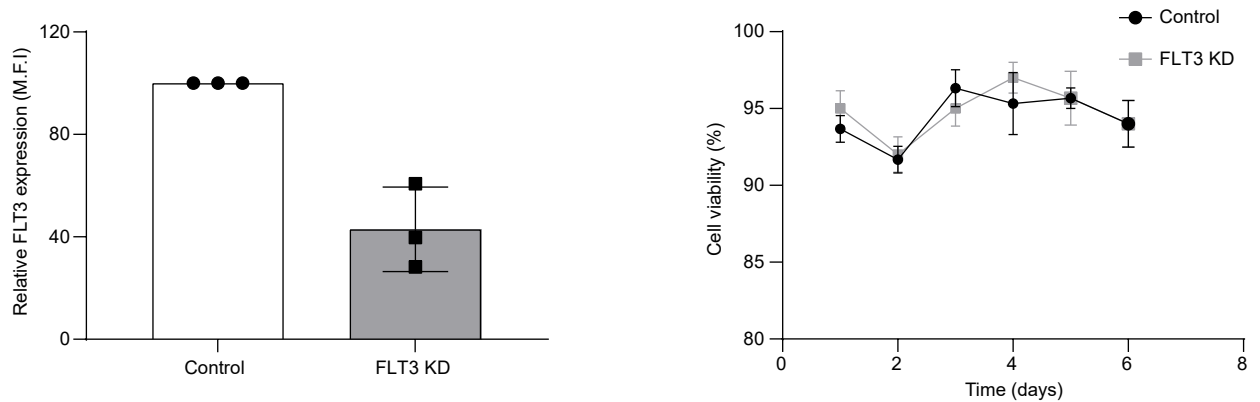

**Supplementary Fig. 5: Knocking down FLT3 led to decreased cell viability in JIH5 cells.** Down regulation of *FLT3* (using siRNA) led to decreased cell viability of JIH5 cells (a), but knocking down *FLT3* (using dCas9/CRISPR) didn't alter the viability of 697 (b) and REH cells (c). Data are shown as mean values  $\pm$  SEM of three biological replicate (center of the error bar) and results are representative of three independent experiments. *P* value ( $P = 0.028$ ) of panel a was estimated using two-sided *t*-test. M.F.I., Mean Fluorescent Intensity. Source data are provided as a Source Data file.

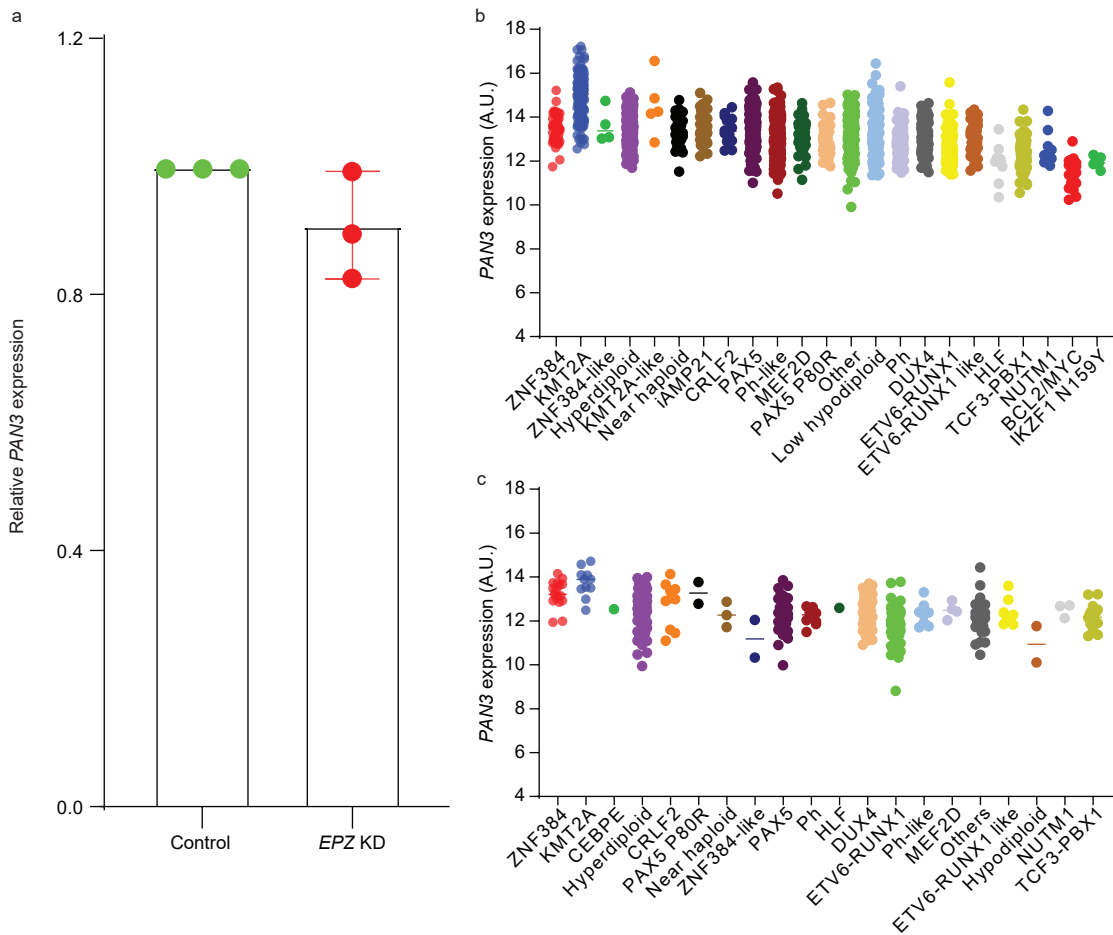

**Supplementary Fig. 6: Expression of *PAN3* was not regulated by *ZNF384* fusion gene.** **a** Expression of *PAN3*, the nearby gene of *FLT3*, was not significantly altered after downregulation of *EP300-ZNF384* fusion gene in JIH5 cells. Expression was determined by qRT-PCR and normalized to control. Data are shown as mean values  $\pm$  SEM of three biological replicates (center of the error bar) and results are representative of three independent experiments. **b** *PAN3* expression across different B-ALL subtypes in the US cohort of 1,988 children and adults ( $n = 1,988$ ). **c** *PAN3* expression across different B-ALL subtypes in the Asian cohort ( $n = 377$ ). A.U., arbitrary units. Center lines of panels **b** and **c** indicate median values of *PAN3* expression. Source data are provided as a Source Data file.

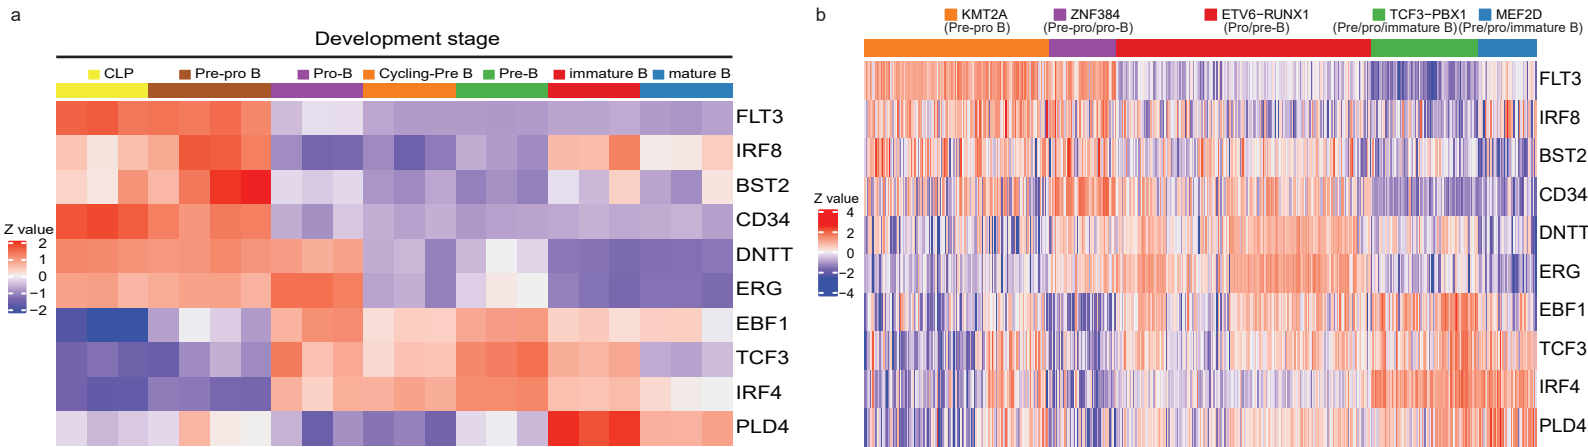

**Supplementary Fig. 7: *FLT3* expression in ALL is linked to B-cell differentiation stages.** **a** Seven stages of B-cell differentiation were identified using expression of 10 marker genes (*FLT3*, *IRF8*, *BST2*, *CD34*, *DNNT*, *ERG*, *EBF1*, *TCF3*, *IRF4*, and *PLD4*) (Michio W Painter, et al., J Immunol. 2011 Mar 1;186(5):3047-57.) on the basis of analyzing genome-wide gene expression data of normal hematopoietic cells (dataset: A comprehensive single cell transcriptional landscape of human hematopoietic cells [<https://data.humancellatlas.org/explore/projects/5116c081-8be7-49c5-8ce0-73b887328aa9>]). **b** Based on the expressions of these 10 genes, *KMT2A*-r subtype was defined as Pre-pro B, *ZNF384*-r subtype as Pre-pro or pro-B, *ETV6-RUNX1* subtype as Pro-or Pre-B, *TCF3-PBX1* and *MEF2D* subtypes as Pro- or pre- or immature B.

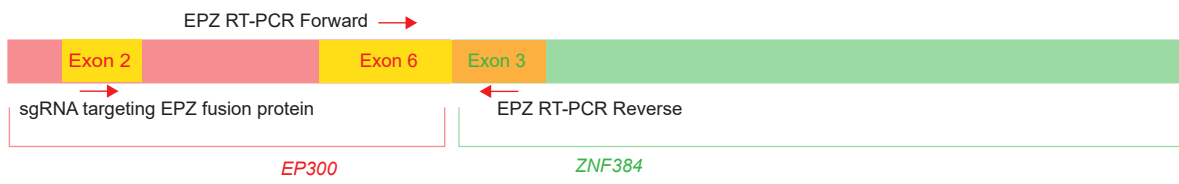

**Supplementary Fig. 8: Positions of sgRNA and primers targeting EPZ fusion gene.** The relative positions of sgRNA targeting EPZ fusion gene and primers for EPZ fusion gene RT-PCR were indicated by arrows.



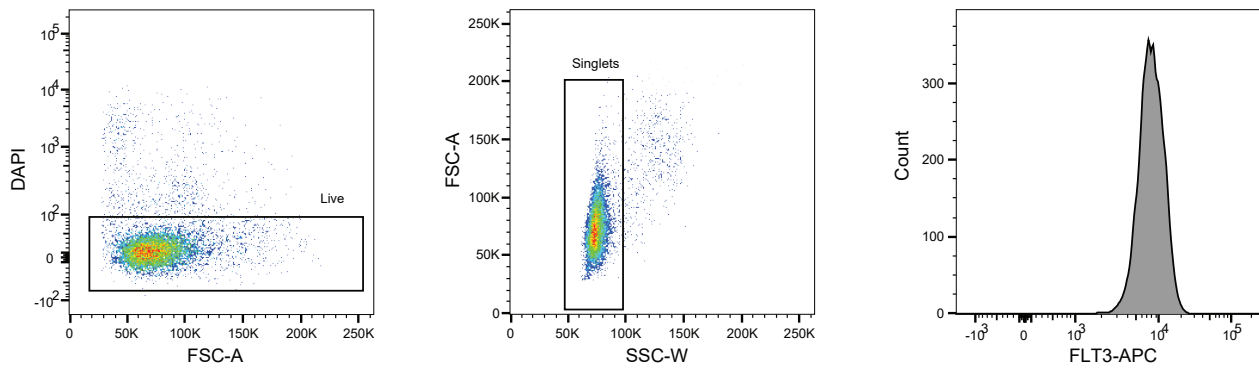

**Supplementary Fig. 9: Gating strategy for determining expression of FLT3 on the cell surface of leukemia cells.** Leukemia cells were stained with FLT3-APC antibody. DAPI and FSC-A were used to determine live cells. FSC-A and SSC-W were used to determine singlets. FLT3-APC positive cells were gated to determine the expression of FLT3 on the cell surface.

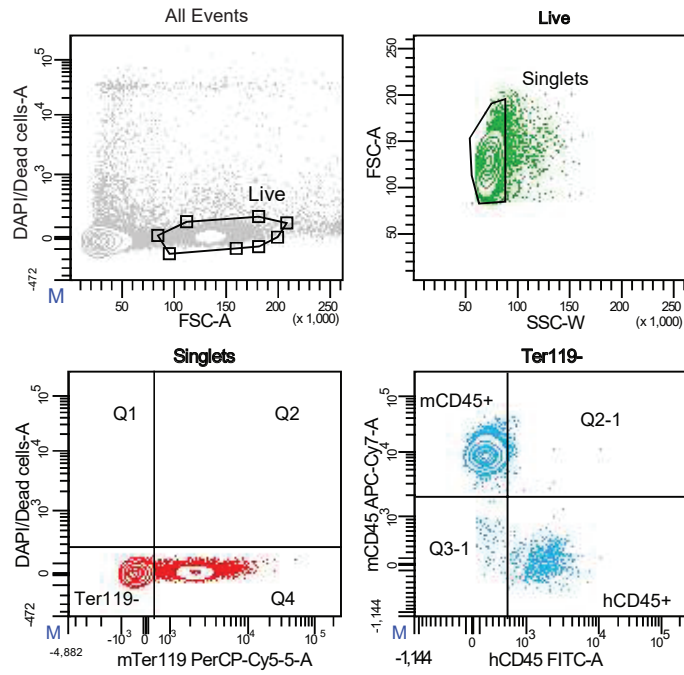

**Supplementary Fig. 10: Gating strategy for determining human blast percentage in PDX mouse.** Mouse retro-orbital blood was RBC lysed and then analyzed by flow cytometry. FSC-A/DAPI was used to determine live cells, and SSC-W/FSC-A was used to determine singlets. DAPI and TER119 were used to determine singlet live lymphocytes (non-red blood cells). Then hCD45 and mCD45 were used to determine human blast percentage.

**Supplementary Table 1 : sgRNA for CRISPR/Cas9 knocking out *EP300-ZNF384* fusion gene**

| Name  | Forward              | Reverse              |
|-------|----------------------|----------------------|
| sgRNA | CTGTCAGAATTGCTGCGATC | GATCGCAGCAATTCTGACAG |

**Supplementary Table 2 : Quantitative real-time PCR primers for *EP300-ZNF384* fusion gene, *FLT3*, and *PAN3***

| Name                | Forward                 | Reverse               |
|---------------------|-------------------------|-----------------------|
| <i>FLT3</i>         | AGGGACAGTGTACGAAGCTG    | GCTGTGCTTAAAGACCCAGAG |
| <i>EP300-ZNF384</i> | AGCTCTTGGACTACCCTATCA   | TTCTCGATCTGACCTGAGACT |
| <i>PAN3</i>         | CCGCTACTACGCTAAGGATAAGA | GGGACGCTGTTGCTATGGAG  |
| <i>S18</i>          | AGGAGCGATTTGCTGGTGTG    | GCTACCAGGGCCTTTGAGAT  |

**Supplementary Table 3. Information (sex and age) of participants in ex vivo drug sensitivity assay**

|              | Subtype | LC50 of gilteritinib (nM) | Gender | Age (year) |
|--------------|---------|---------------------------|--------|------------|
| BCR-ABL1     | Case 1  | 695.59                    | NA     | >18        |
|              | Case 2  | 1032.653                  | NA     | >18        |
| DUX4         | Case 1  | 128.852                   | Female | >18        |
|              | Case 2  | 199.61                    | Male   | <10        |
|              | Case 3  | 233.906                   | Male   | <10        |
|              | Case 4  | 245.244                   | Female | >10        |
|              | Case 5  | 824.083                   | Male   | >10        |
|              | Case 6  | 1005.404                  | NA     | >18        |
| ETV6-RUNX1   | Case 1  | 139.049                   | Female | <10        |
|              | Case 2  | 159.316                   | Female | <10        |
|              | Case 3  | 164.903                   | Male   | <10        |
|              | Case 4  | 527.807                   | Male   | <10        |
|              | Case 5  | 689.881                   | Male   | <10        |
|              | Case 6  | 786.77                    | Female | <10        |
|              | Case 7  | 817.807                   | Male   | <10        |
|              | Case 8  | 847.368                   | Female | >10        |
|              | Case 9  | 928.041                   | Male   | <10        |
|              | Case 10 | 1214.616                  | NA     | >18        |
|              | Case 11 | 1294.78                   | NA     | >18        |
|              | Case 12 | 20000                     | NA     | >18        |
| Hyperdiploid | Case 1  | 147.942                   | Female | <10        |
|              | Case 2  | 342.092                   | Female | <10        |
|              | Case 3  | 853.5                     | Male   | <10        |
|              | Case 4  | 862.059                   | Male   | <10        |
|              | Case 5  | 955.324                   | Male   | <10        |
|              | Case 6  | 1117.684                  | Female | <10        |
|              | Case 7  | 5578.25                   | NA     | >18        |
|              | Case 8  | 20000                     | Female | <10        |
|              | Case 9  | 20000                     | NA     | >18        |
| T-ALL        | Case 1  | 474.794                   | NA     | >18        |
|              | Case 2  | 831.35                    | Female | <10        |
|              | Case 3  | 863.692                   | Male   | <10        |
|              | Case 4  | 904.718                   | Female | <10        |
|              | Case 5  | 1047.975                  | NA     | >18        |
|              | Case 6  | 2510.443                  | NA     | >18        |
|              | Case 7  | 3962.696                  | NA     | >18        |
|              | Case 8  | 20000                     | NA     | >18        |
|              | Case 9  | 20000                     | NA     | >18        |
| TCF3-PBX1    | Case 1  | 486.559                   | Male   | <10        |
|              | Case 2  | 634.937                   | Female | <10        |
|              | Case 3  | 952.715                   | Male   | <10        |
|              | Case 4  | 983.779                   | Male   | >10        |
|              | Case 5  | 1001.538                  | Female | >10        |
|              | Case 6  | 1038.442                  | Male   | >10        |
| ZNF384       | Case 1  | 4.885                     | Male   | <10        |
|              | Case 2  | 4.885                     | Male   | >18        |
|              | Case 3  | 17.948                    | Female | >18        |
